# Supplementary material for: Enhanced photoelectrochemical water oxidation of bismuth vanadate via a combined strategy of W doping and surface RGO modification
Source: Royal Society of Chemistry journal article supplement (doi:10.1039/c6cp06233d), 2016-01-01
Supplement: c6cp06233d1.pdf [file c6cp06233d1.pdf]

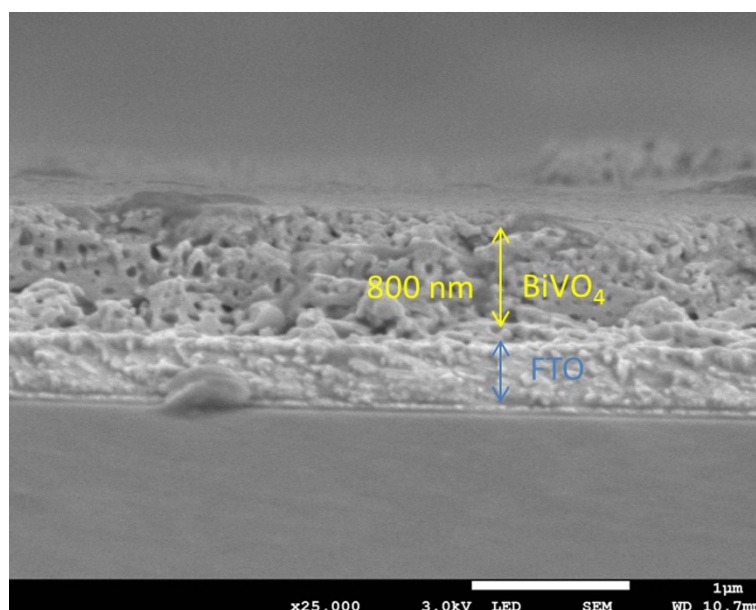

Figure S1. Cross-section SEM image of the BiVO<sub>4</sub> film.

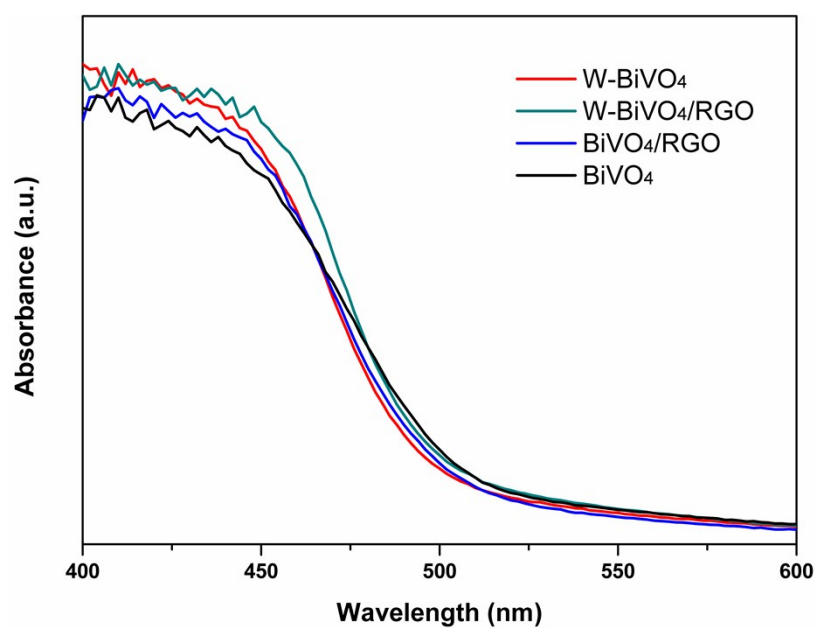

Figure S2. UV-Visible absorption spectrum of the pure and modified films.

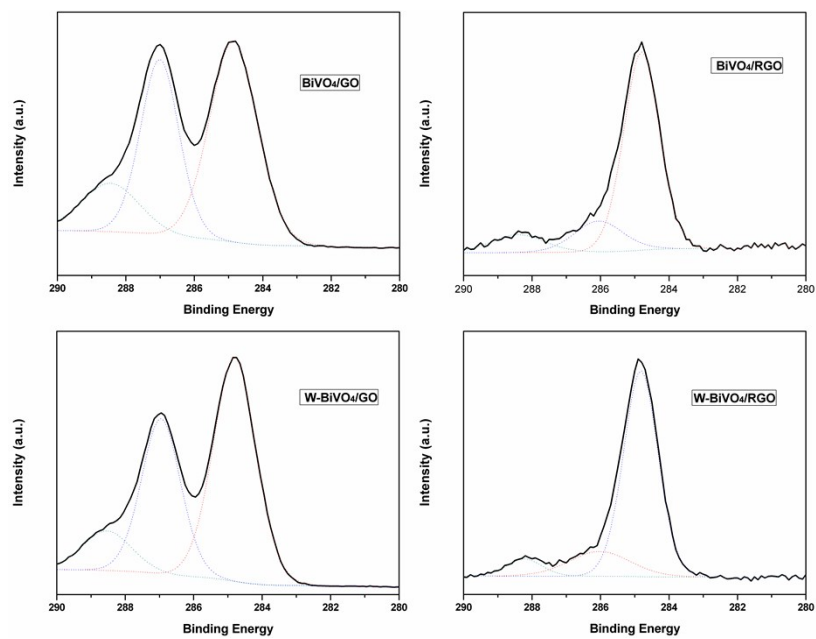

Figure S3. C 1s XPS spectra BiVO<sub>4</sub>/GO, BiVO<sub>4</sub>/RGO, W-BiVO<sub>4</sub>/GO and W-BiVO<sub>4</sub>/RGO

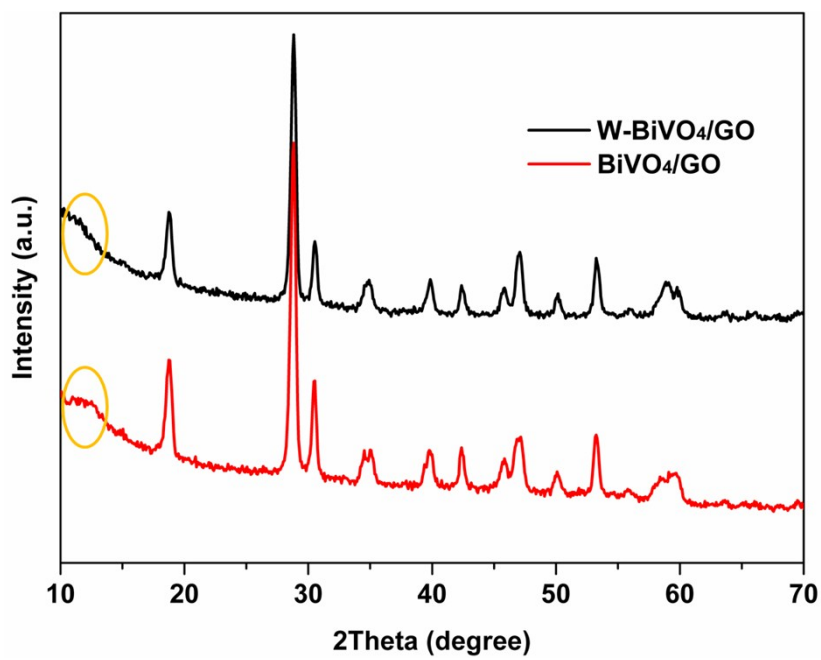

Figure S4. XRD patterns of BiVO<sub>4</sub>/RGO and W-BiVO<sub>4</sub>/RGO.

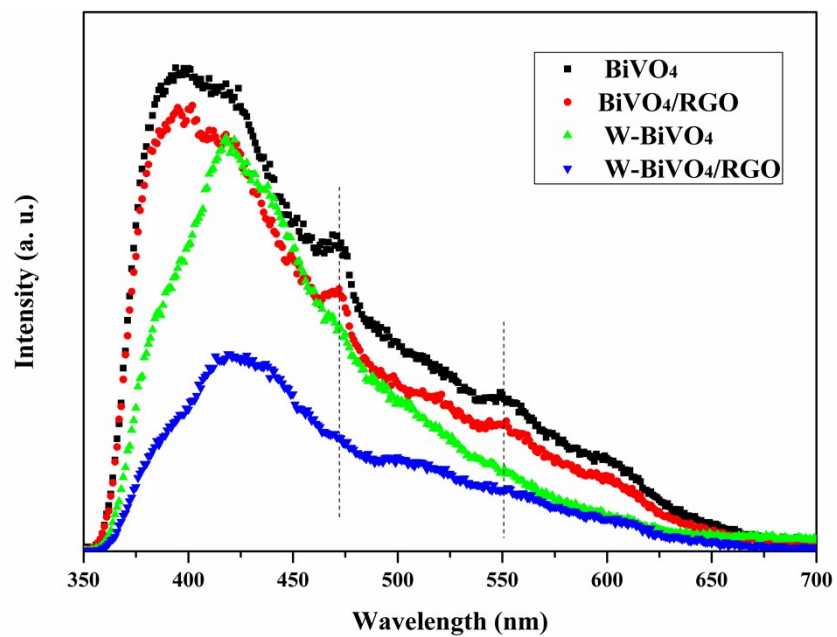

Figure S5. Photoluminescence spectra (PL) of  $\text{BiVO}_4$ ,  $\text{W-BiVO}_4$ ,  $\text{BiVO}_4/\text{RGO}$  and  $\text{W-BiVO}_4/\text{RGO}$  with the excitation wavelength of 325 nm.
